## Über einige zur Bestimmung der Grösse des Fischbestandes eines Gewässers benötigten Daten.

Von

**S. Awerinzew,**  
Moskau.

---

IN seinem in den Rapp. et Proc. Verb. Vol. LXXX veröffentlichten Aufsatz bespricht **Erich Fischer** das Problem wie weit der Fang geschlechtsunreifer Fische die Grösse des Fanges ausgewachsener Fische — m.a.W. die Grösse des Bestandes der gegebenen Form (der Vorräte derselben) — beeinflusst. Um den möglichen Vernichtungsprozentsatz der Eier, Larven und Jungfische, bei dem keine Störung der normalen Zahl der Exemplare eintritt, zu ermitteln, benutzt er unter anderem den Vernichtungsquotienten, den er nach **Bremers** Formel (Zeitschr. f. ang. Entom. 1928)  $100q = 100(a-b)$  ausrechnet (wo  $a$  die durchschnittliche Eizahl und  $b$  den Anteil der Eltern am Gesamtbestand der zur Fortpflanzung gelangenden Tiere darstellt).

Gebraucht man diese Formel, so muss man unumwunden mit **E. Fischer** schliessen, dass für die Mehrzahl der Fische der Vernichtungsquotient äusserst hoch steht (z. B. 99.999 % für *Pleuron. platessa*), anders gesagt, dass es zur Aufrechterhaltung der Individuenzahl innerhalb der üblichen Norm genügt, wenn von Hunderttausend, ja sogar von Millionen Eiern nur 1—2 Eier sich zu geschlechtsreifen Individuen entwickeln.

Meines Erachtens liegt keine Notwendigkeit vor, zur Berechnung des Vernichtungsquotienten zu greifen, da es augenscheinlich ist, dass die ganze Nachkommenschaft mit Ausnahme des besagten Paares vernichtet werden kann, wenn es nur auf die Erhaltung eines Individuenpaares ankommt. Die Formel verleiht dieser Auseinandersetzung nur eine mathematische Form, die besonders für Entomologen bei Besprechung einiger praktischer Massnahmen bequem ist. Statt derartiger völlig selbstverständlicher Erörterungen ist m.E. die Kenntnis der Gesetzmässigkeiten der Vernichtungsbiologie verschiedenartiger Fische

sowie der Bedingungen, die dabei diese oder jene Rolle spielen, viel wichtiger. Wir müssen wissen, wie gross die Vernichtung der Jungfische in verschiedenem Alter ist und wie gross die Vernichtung ausgewachsener Exemplare ist; ferner müssen auch die Ursachen dieser Vernichtung ermittelt werden und schliesslich muss festgestellt werden, welcher Einfluss in diesem und jenem Falle den Fängen zukommt.

Es ist bereits seit langem bekannt, dass die Zunahme der Individuenpotentiale in geometrischer Progression stattfindet. Die Anzahl der Individuen hängt nicht allein von der Zahl der Eier ab, sondern auch davon, in welchem Alter die Individuen dieser oder jener Art geschlechtsreif werden und nach Verlauf welcher Zeit bei ihnen Eiablage stattfindet.

Diesbezügliche Berechnungen sind von S. A. Sewertzoff (in einigen russisch abgefassten Aufsätzen, die sich auf die Vermehrungsbiologie von Säugern und Vögeln beziehen) ausgeführt worden. Dieser Forscher hat gezeigt, dass die im einjährigen Alter zur Vermehrung schreitende Art beispielsweise nach 7 Jahren eine bestimmte Anzahl geschlechtsreifer Individuen haben wird, während eine andere Art, die sich erst mit drei Jahren vermehrt, bei gleicher Ausgangszahl der Jungen erst nach 13 Jahren ebenso zahlreich sein wird.

Diese Eigentümlichkeit habe ich unabhängig von Sewertzoff in meinen Untersuchungen der Salmoniden Familie, im speziellen der *Coregonidae* aus dem Unterlaufe des Lena Flusses (Arbeiten der Jakuter Fischereiwirtschaftlichen Station, Lief. 2. 1932—1933) bei meiner Beurteilung der Grösse der Bestände gewisser Fischarten und der Geschwindigkeit der Wiederherstellung derselben vermerkt. Dabei stellte es sich heraus, dass ein und dieselbe Art z.B. *Coregonus autumnalis* aus dem Unterlaufe des Flusses Petschora (Nordeuropa) einerseits und aus dem Unterlaufe des Flusses Lena (Nordasien) andererseits bei Weitem nicht im gleichen Alter geschlechtsreif wird. Im Unterlauf der Lena werden die Männchen dieser Art in ihrem zehnten Lebensjahre (und auch noch nicht alle) geschlechtsreif, die Weibchen im elften Lebensjahre. Einige Männchen erreichen Geschlechtsreife im zwölften und es gibt Weibchen, die im dreizehnten, ja vielleicht sogar manchmal im vierzehnten Lebensjahre reif werden. Im Fluss Petschora sind diese Termine um 4 oder 5 Jahre verkürzt. Demnach ist es selbstverständlich, dass nach Verlauf einer und derselben Anzahl Jahre die Grösse des Bestandes von *Coregonus autumnalis*, bei einer und derselben Ausgangszahl der Exemplare, in diesen zwei Gewässern von Grund aus verschieden sein muss.

Da die Temperatur und andere Umweltsbedingungen im Lena-Delta viel rauher sind als im Delta des Flusses Petschora, so unterliegt es keinem Zweifel, dass ein Zusammenhang zwischen den physikalisch-geographischen Bedingungen und der Grösse des Fischbestandes bestehen muss, der sich nicht nur in einer grösseren oder geringeren Sterblichkeit der Jungfische, sondern auch in einer von der Umwelt ausgeübten Beeinflussung der Vermehrungsprozesse kundgibt. Ich bin aber fest

davon überzeugt, dass zwecks Selbsterhaltung der Art gewisse Reaktionen zukommen, welche den schädlichen Einfluss der Umwelt zu hemmen vermögen.

Während meiner Arbeiten im Lena-Delta habe ich festgestellt, dass bei den Vertretern der Salmoniden Familie die Männchen viel früher zugrunde gehen als die Weibchen. So habe ich bei besagten *C. autumnalis* unter den Männchen nie Exemplare getroffen, die älter als die XVII-Jahresgruppe waren, während unter den Weibchen sogar der XX-Gruppe angehörende Individuen vorkamen. Bei *C. muksun* dagegen erreichten die einen wie die anderen das gleiche Alter. Es unterliegt keinem Zweifel, dass zwei solche Arten, wenn die übrigen Bedingungen auch ganz gleich wären und wenn sie dieselbe Ausgangszahl der Exemplare besäßen, doch innerhalb einer und derselben Zeitperiode eine verschiedene Zahl erreichen würden.

Beim Vergleichen der Biologie der der gleichen Art angehörenden Fische aus dem Unterlaufe des Flusses Petschora einerseits und dem des Lena Flusses andererseits habe ich mich vergewissern können, dass die Lebensdauer derselben höchst ungleich sein kann. Im Flusse Lena leben die Fische um 5—6 Jahre länger als im Flusse Petschora. Dies ist leicht erklärlich; denn was wäre aus der Art geworden, wenn sie dieselbe Lebensdauer hätte, wo sie erst im späteren Alter ihre Geschlechtsreife erreicht. Ihr würde das Aussterben drohen. Somit muss irgend ein Zusammenhang bestehen zwischen den physikalisch-geographischen Bedingungen, oder, anders gesagt, den Existenzbedingungen der Organismen, der Zeit des Eintretens ihrer Geschlechtsreife und ihrer Lebensdauer.

Da sich schliesslich alles auf Vermehrung, also auf die Grösse der Nachkommenschaft zurückführen lässt, so muss auch diese mit den erwähnten Faktoren verknüpft sein. Obwohl mir zur Zeit direkte Beweise fehlen, so bin ich dennoch der Meinung, dass sämtliche hier aufgezählten Erscheinungen mit der Aktivität des Menschen, die sich im Fischfang ausdrückt, gewissermassen verknüpft sind. Diese Aktivität besteht nicht allein in der Vernichtung gewisser Mengen geschlechtsreifer Individuen und Jungfische, sondern vermag auch auf direktem oder indirektem Wege bei gewisser Intensität des Fanges Veränderungen in der Vermehrungsbiologie herbeiführen.

Es ist auch noch zu vermerken, dass das Tempo, in welchem die Zahl der Individuen zunimmt, von einem weiteren Faktor abhängt und zwar von der Länge der Zeit, die zwischen zwei Laichperioden verläuft. Hier nimmt wiederum die Zahl der Nachkommenschaft scharf ab, wenn das Laichen nicht alljährlich, sondern (von noch längeren Zeitperioden abgesehen) einmal in zwei Jahren stattfindet.

Dieses Problem ist für Fische gar nicht ausgearbeitet worden. Meine im Unterlaufe des Flusses Lena ausgeführten Untersuchungen haben gezeigt, dass diese Erscheinung wenigstens für einige Fische (so z.B. für *Stenodus leucichthys nelma*, *Coregonus autumnalis* u.a. Arten) eine unbestreitbare Tatsache darstellt.

Vermutlich wird es sich bei detaillierteren Untersuchungen herausstellen, dass bei denselben Fischarten, die aber aus verschiedenen Regionen stammen, diese Zeitperiode verschieden sein kann. Im engen Zusammenhang damit steht auch sowohl die Lebensdauer der Individuen, wie die Menge des von diesen abgelaichten Rogens.

Durch Obengesagtes wollte ich nur darauf aufmerksam machen, dass wir, wenn wir mit *Bremers* Vernichtungsquotienten operieren, alle hier aufgezählten Besonderheiten der Vermehrungsbiologie unberücksichtigt lassen, die sicher in der Bestimmung der Grösse des Bestandes dieser oder jener Art eine bedeutende Rolle spielen.

Ferner ist aus Erörtertem deutlich zu ersehen, welche Bedeutung für die Grösse des Fischbestandes nicht allein die biologischen Besonderheiten der Art haben, sondern auch die Besonderheiten des Gewässers, welche letzten ihrerseits die Biologie der Art beeinflussen.

Bei Erforschung der Vermehrungsbiologie der Fische lässt sich leicht auf die Vernichtung der Eier und der Jungfische schliessen. Diese Erscheinung ist unzweifelhaft. In ihr spielen wohl die variierenden äusseren Bedingungen des Gewässers eine bedeutende Rolle.

Zwar verhilft die Bedeutung von *Bremers* Vernichtungsquotienten zur richtigen Auffassung der quantitativen Seite dieses Vorganges, aber die wirkliche Grösse der Vernichtung, die unzweifelhaft sowohl von den Artbesonderheiten wie auch von den Besonderheiten des Gebietes abhängt, ist für uns bei weitem noch nicht aufgeklärt.

Aber damit ist noch nicht alles gesagt. Die Existenzbedingungen dieser oder jener Art gestalten sich wahrscheinlich in der Weise, dass die Menge der ausgewachsenen Individuen allmählich zunimmt und schliesslich ein gewisses Maximum erreichen kann, welches letztes von einer rasch auftretenden Vernichtung der geschlechtsreifen ausgewachsenen Individuen begleitet wird. Derartige Erscheinungen sind uns aus dem Leben der Insekten und Säuger bekannt. Auch diese Erscheinungen sind mit der Vermehrungsbiologie aufs engste verknüpft, so dass die Zeitperioden einer derartigen maximalen Zunahme der Individuenzahl bei verschiedenen Arten verschieden sind; auch können sie bei einer und derselben aus verschiedenen Gewässern stammenden Fischart verschieden sein.

Daraus ist auf die Insolvenz der Erklärung derartiger rhythmischer Zunahme der Individuenzahl bei verschiedenen Arten durch Einwirkung irgend eines bestimmten Faktors (wie z. B. Sonnenflecke, Mondphasen usw.) zu schliessen.

Hiermit möchte ich auf einige in der Literatur bis jetzt wenig berücksichtigte Probleme hinweisen, ohne deren Erforschung meines Erachtens es unmöglich ist, alles gebührend aufzuklären.

Was die Grösse und Schwankungen der Fischbestände betrifft und zwar: 1) das Alter, in welchem bei verschiedenen Arten und in verschiedenen Gewässern Geschlechtsreife eintritt, 2) die Zeitabschnitte, die zwischen den Laichperioden bei verschiedenen Arten und in verschiedenen Gewässern verlaufen, 3) die Lebensdauer verschiedener

Arten, zusammen mit den übrigen Besonderheiten der Vermehrungsbiologie, 4) die Erforschung der Erscheinung der Massenvermehrung und des Massensterbens verschiedener Fische in verschiedenen Gewässern.

Die Ermittlung sämtlicher hier aufgestellten Fragen wird wohl zur Aufstellung gewisser Gesetzmässigkeiten bezüglich der potentiellen Zunahme der Bestände verhelfen, und dieses wird ermöglichen, eine gewisse mittlere, für die Meistzahl der Arten gemeine, konstante Grösse der Sterblichkeit auszurechnen und eine gewisse Periodizität im Verlaufe der mit der Zu- resp. Abnahme der Zahl geschlechtsreifer Fische verknüpften Erscheinungen aufzudecken. Dabei wird sich auch der Vernichtungsquotient der Jungfische ausrechnen lassen.

Solange diese Fragen unaufgeklärt bleiben, werden unsere Kenntnisse der Vermehrungsbiologie äusserst mangelhaft sein und solange werden auch die grösseren diesbezüglichen Probleme ihrer Lösung harren.

---
